# Supplementary material for: Conformational preferences of α-fluoroketones may influence their reactivity
Source: publisher site journal article supplement (doi:10.3762/bjoc.13.284), 2017-12-29

# Supporting Information

for

## Conformational preferences of $\alpha$ -fluoroketones may influence their reactivity

Graham Pattison\*

Address: Department of Chemistry, University of Warwick, Gibbet Hill Road, Coventry CV4 7AL, UK

Email: Graham Pattison - [graham.pattison@warwick.ac.uk](mailto:graham.pattison@warwick.ac.uk)

\* Corresponding author

**Copies of NMR spectra showing ratios of fluorinated and halogenated products**

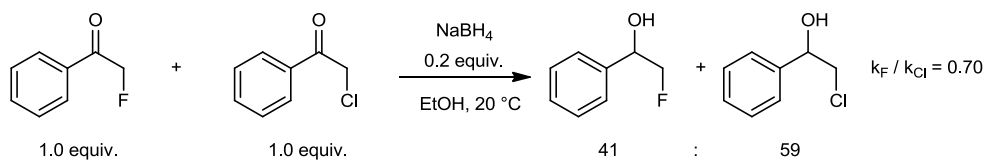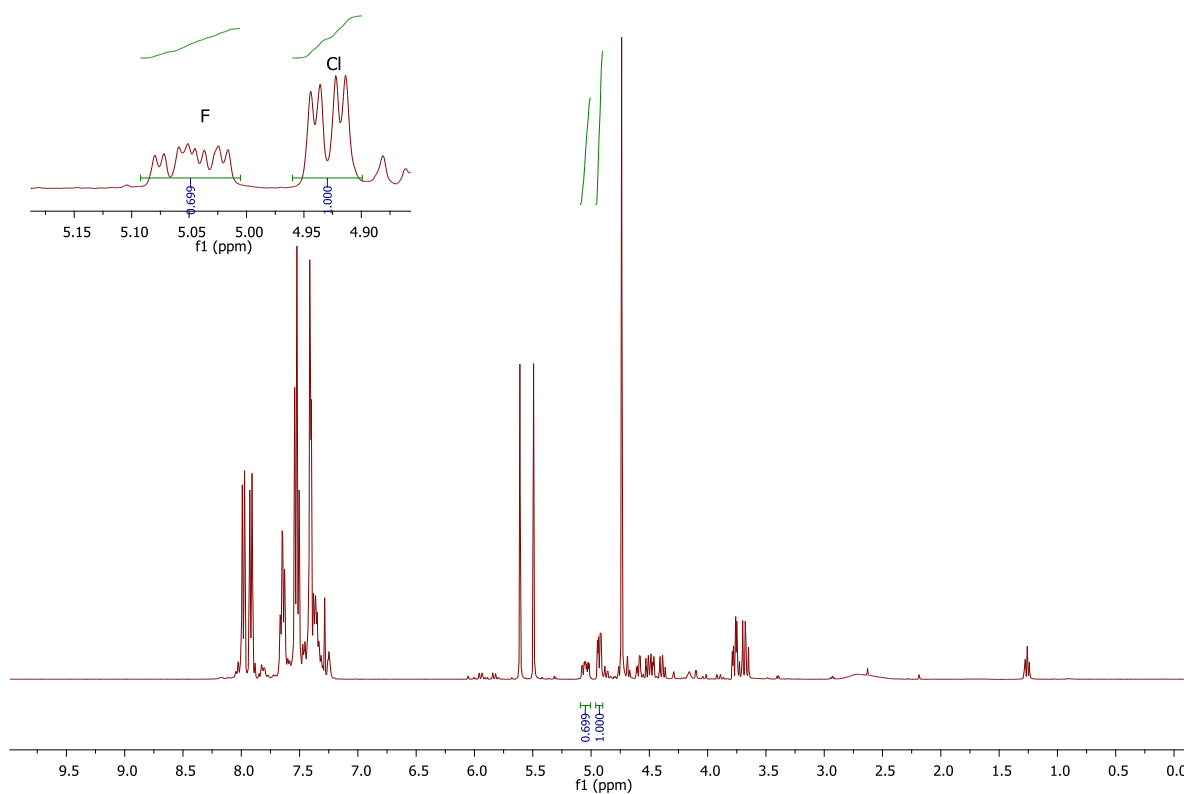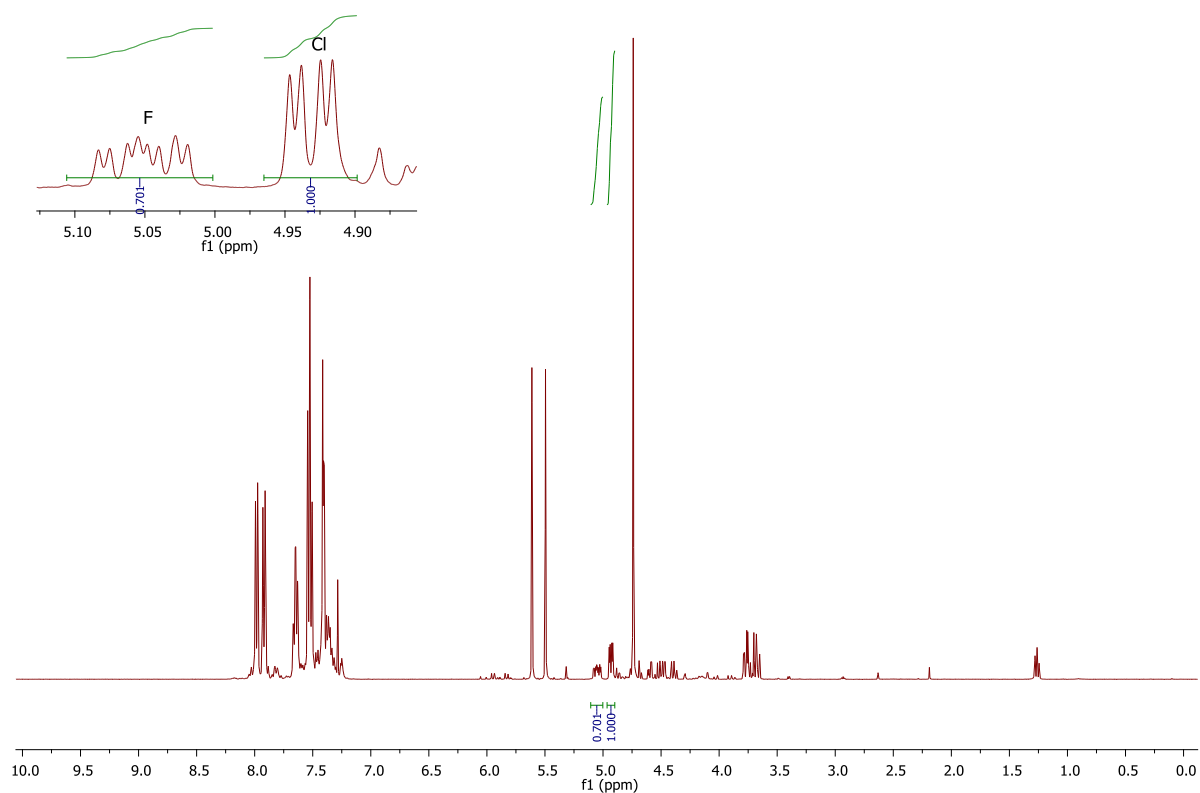

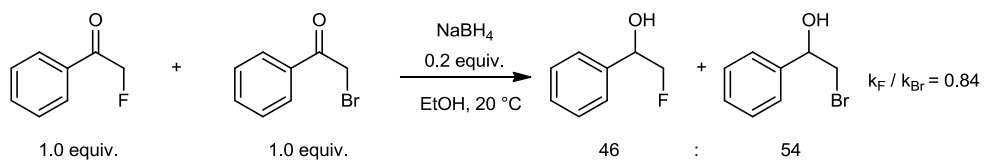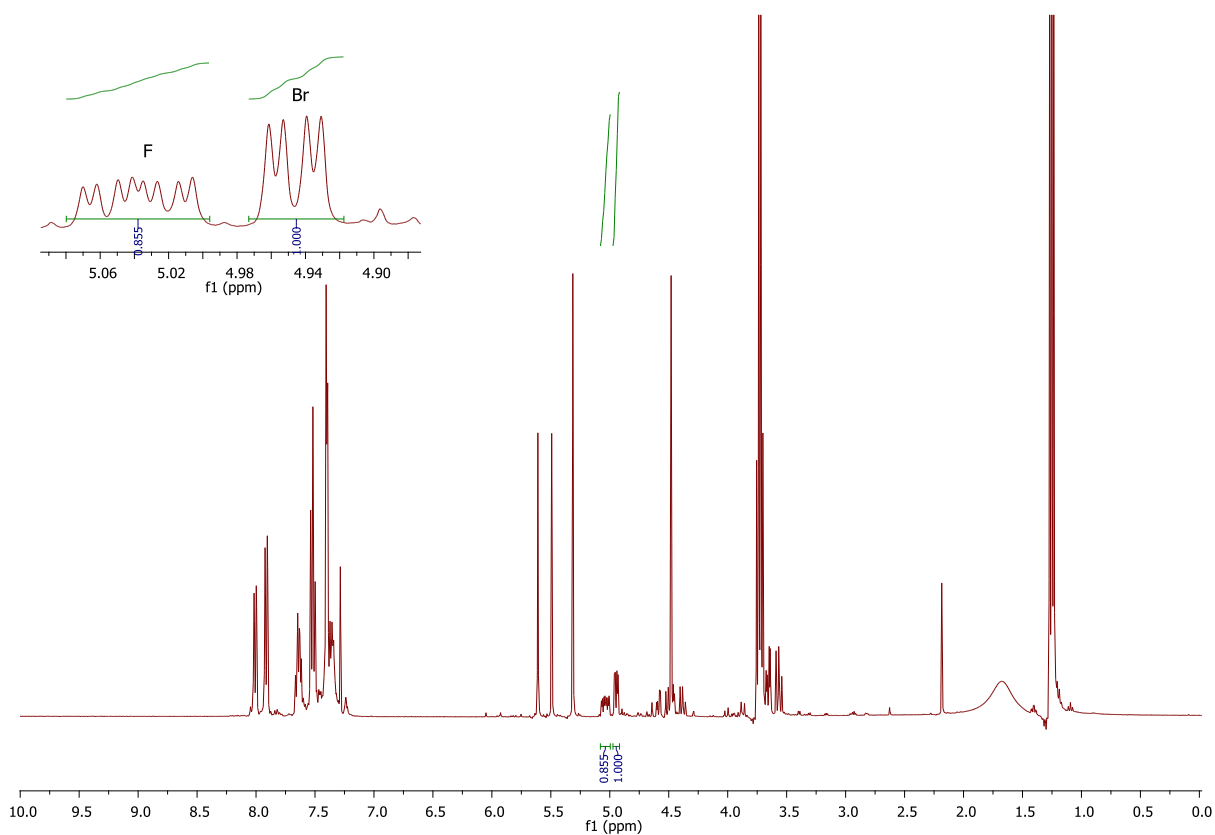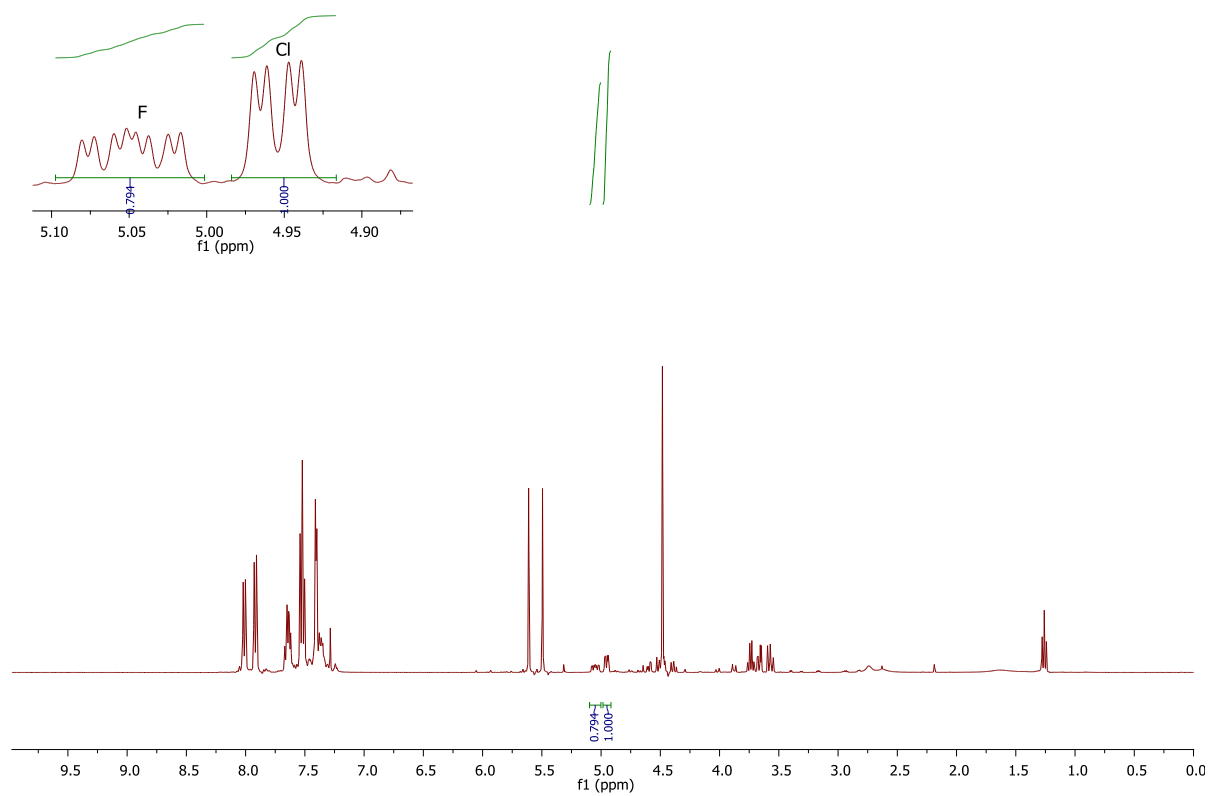

0 °C

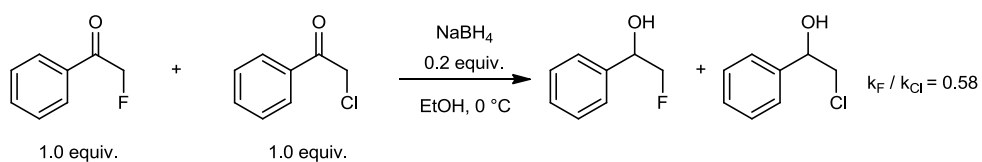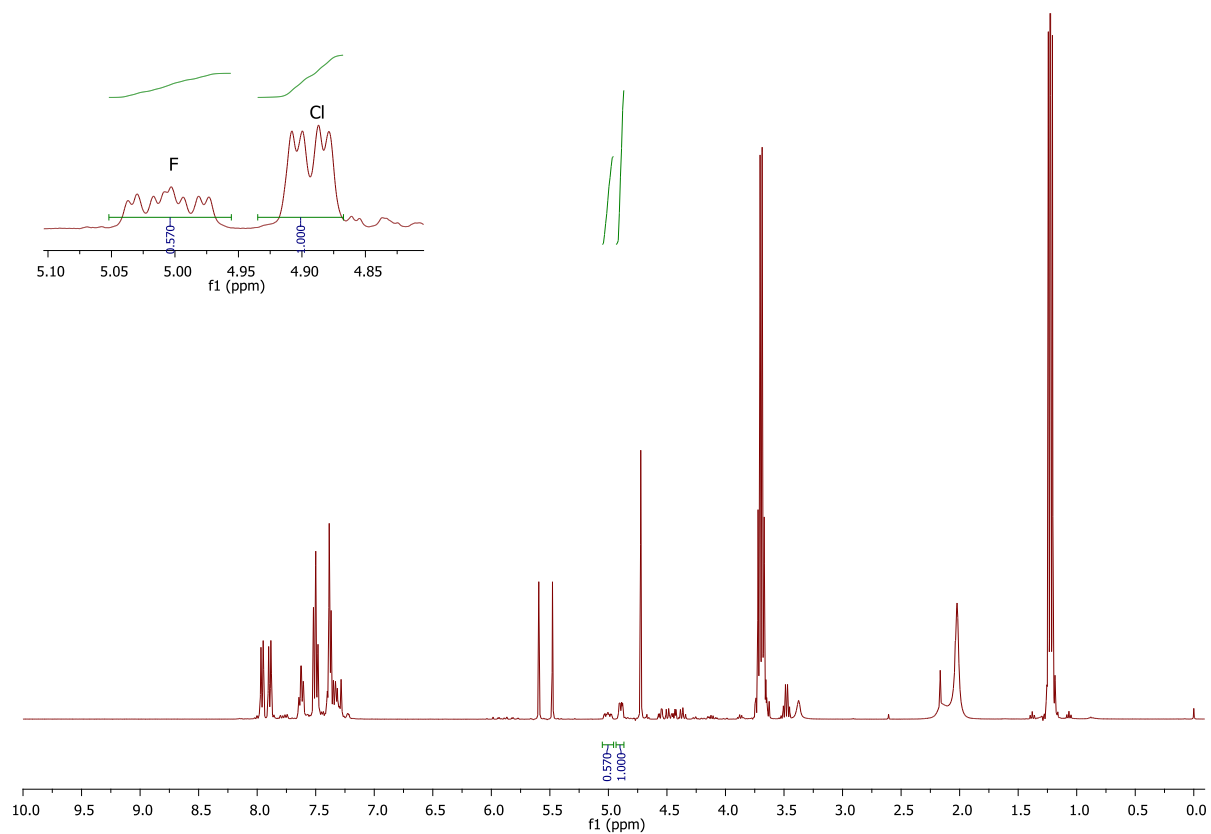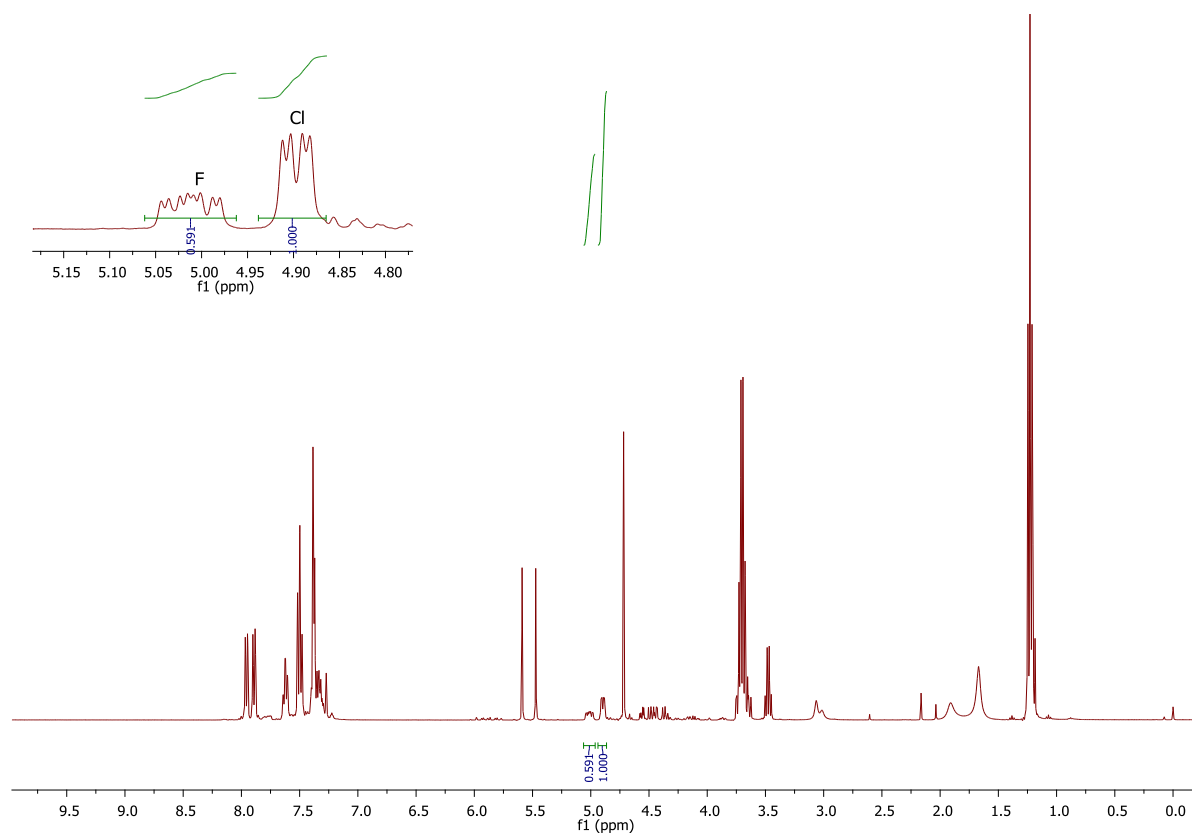

40 °C

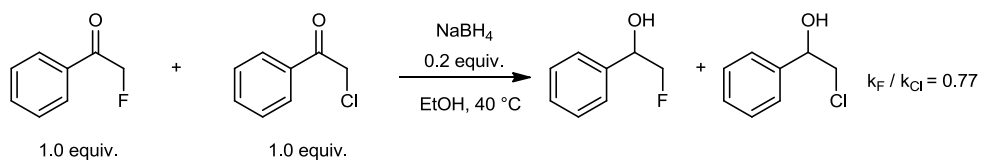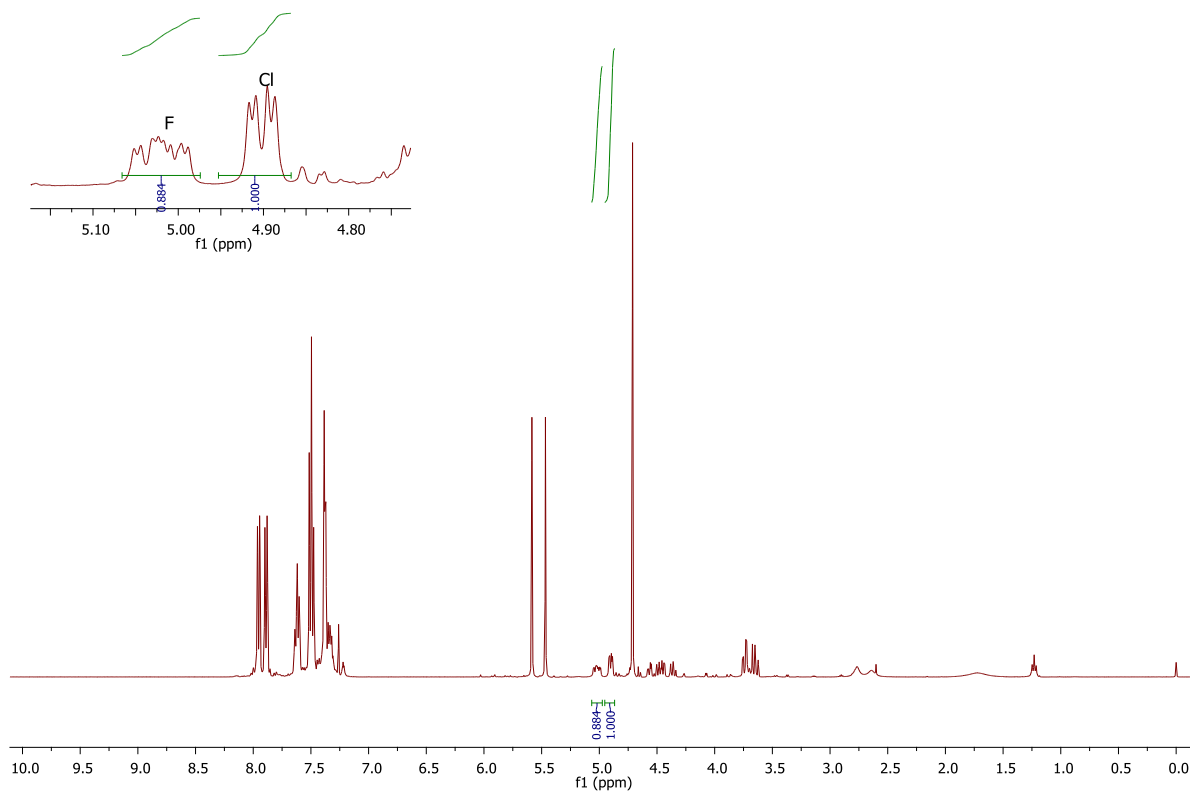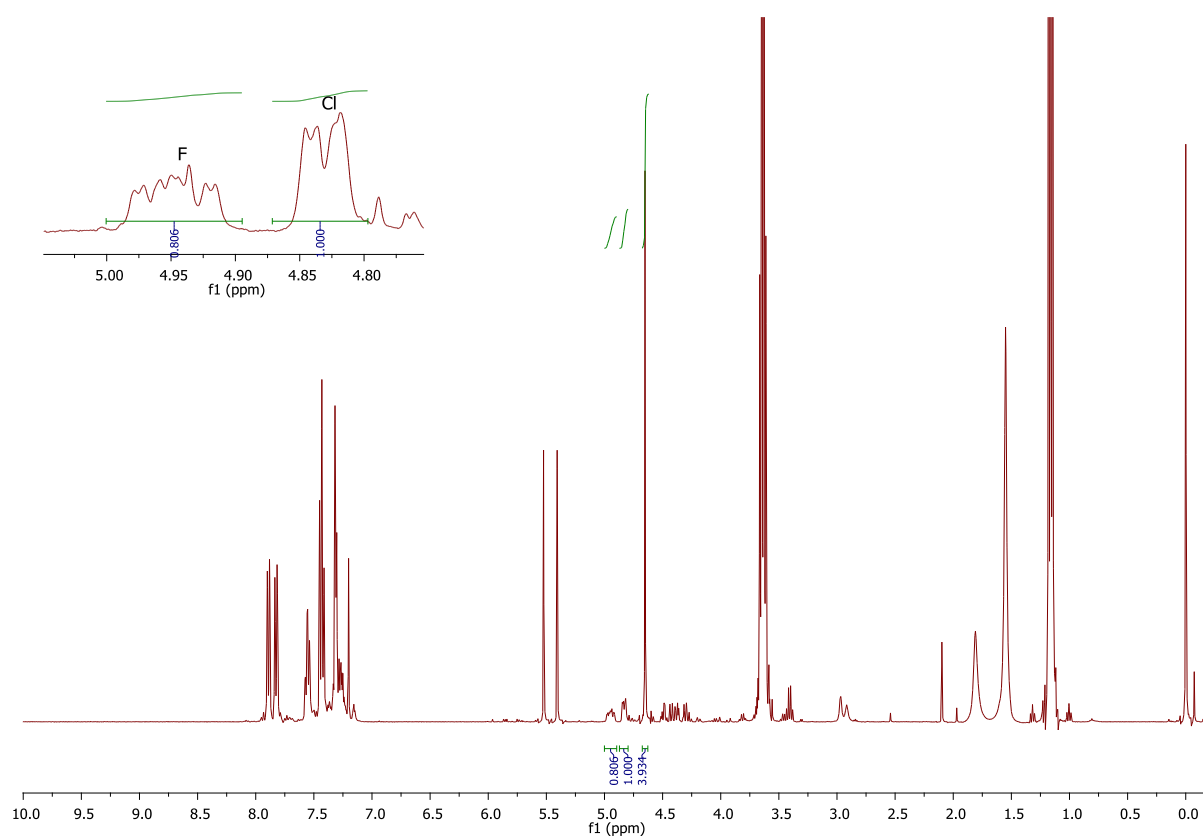

60 °C

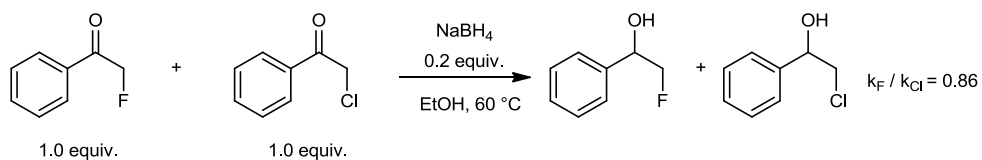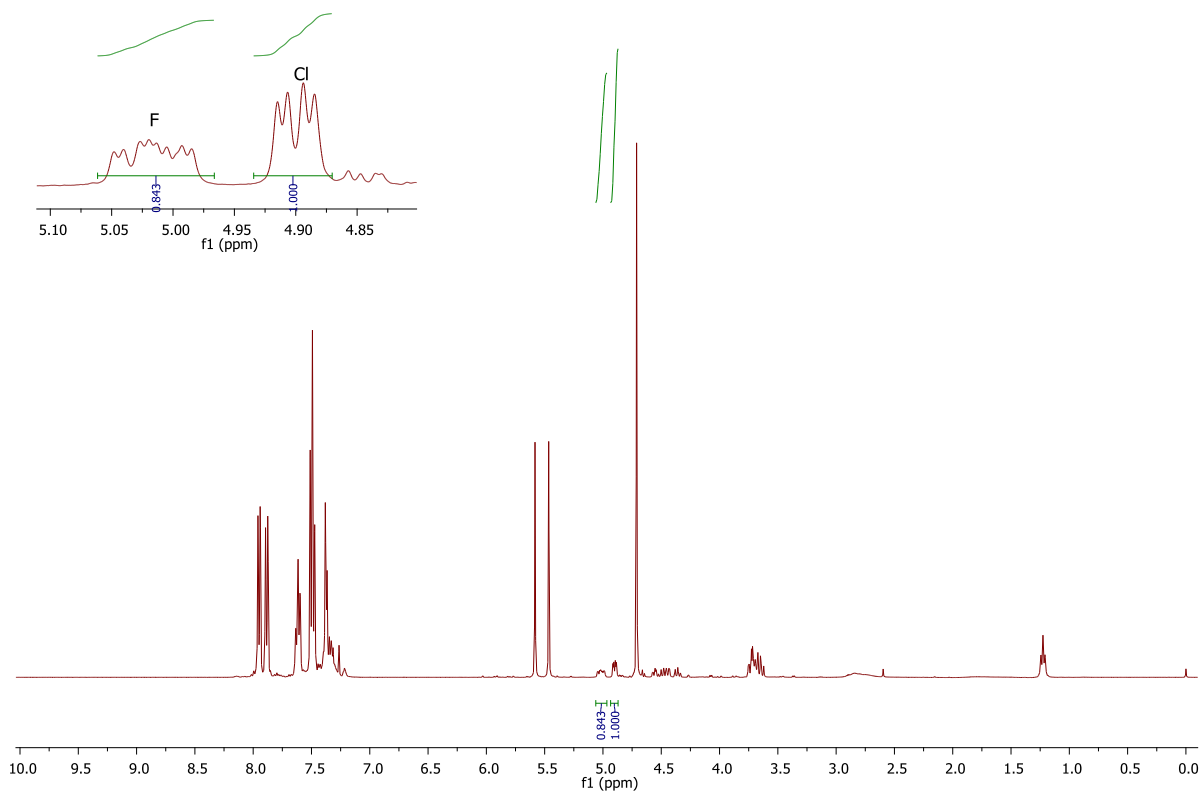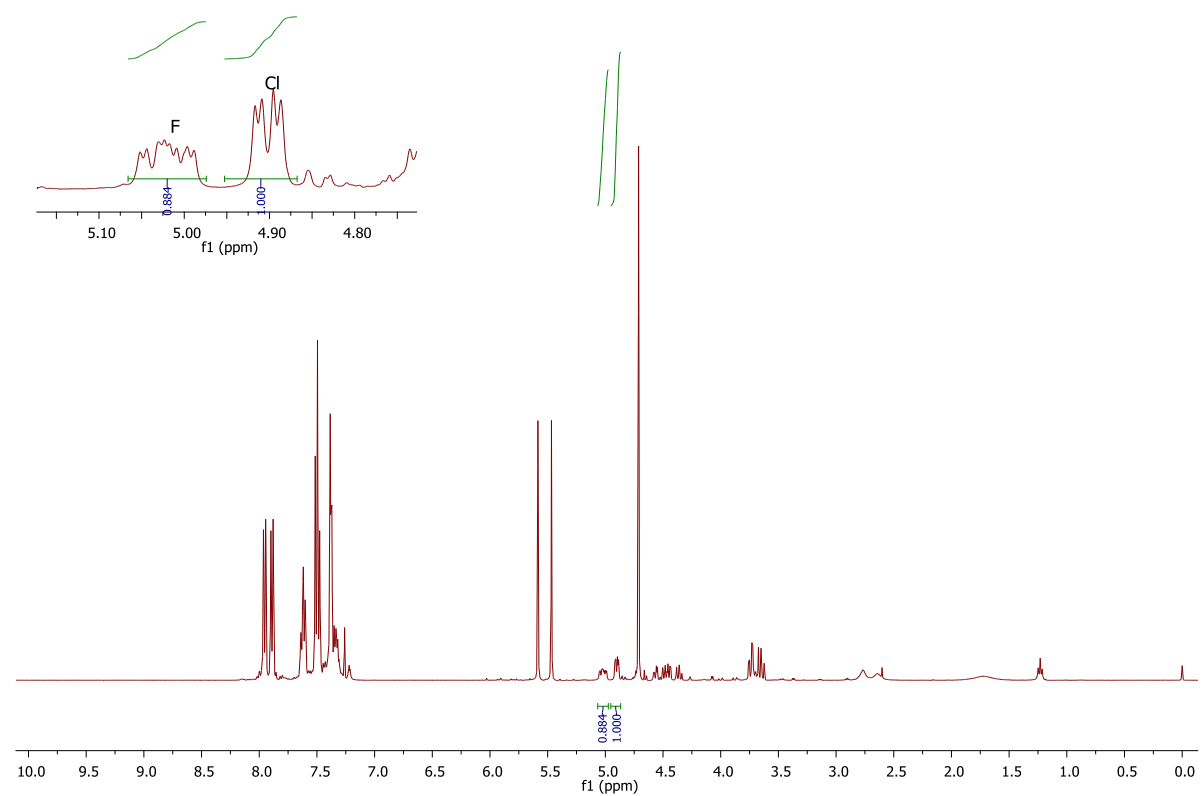

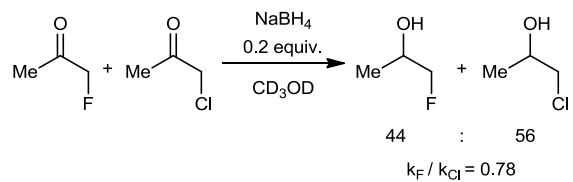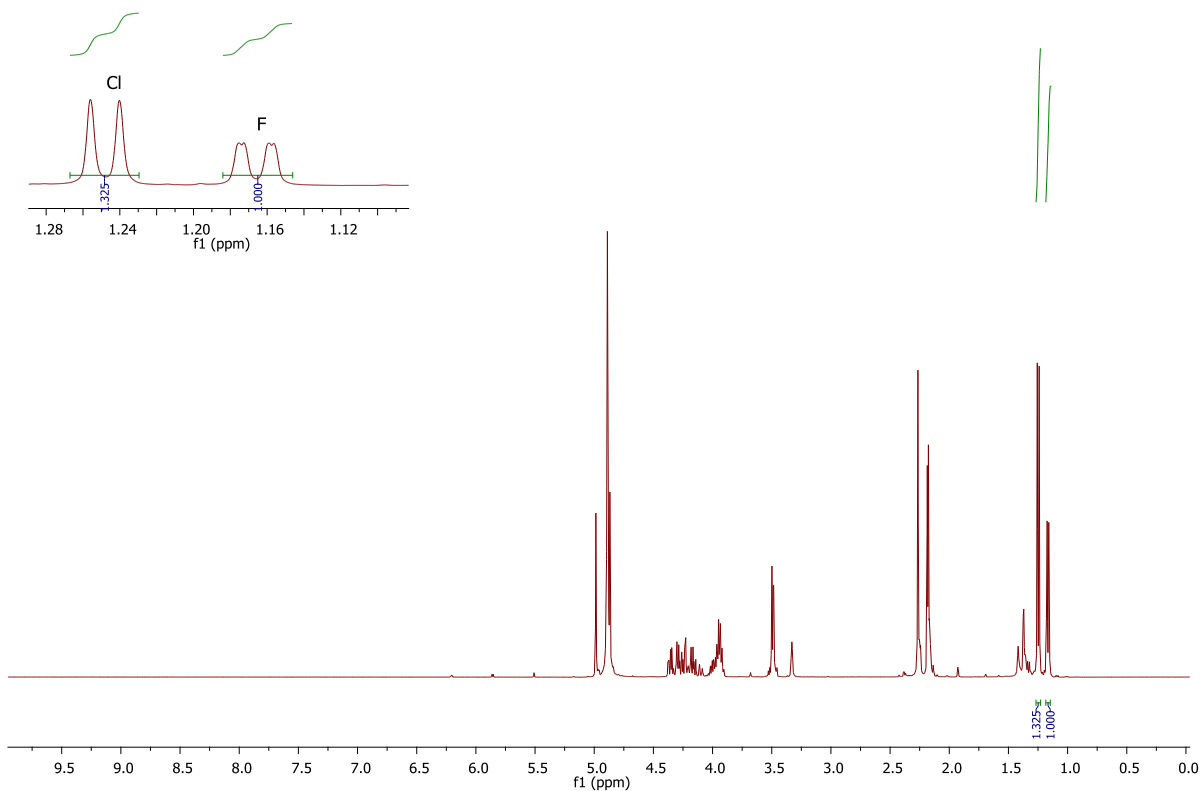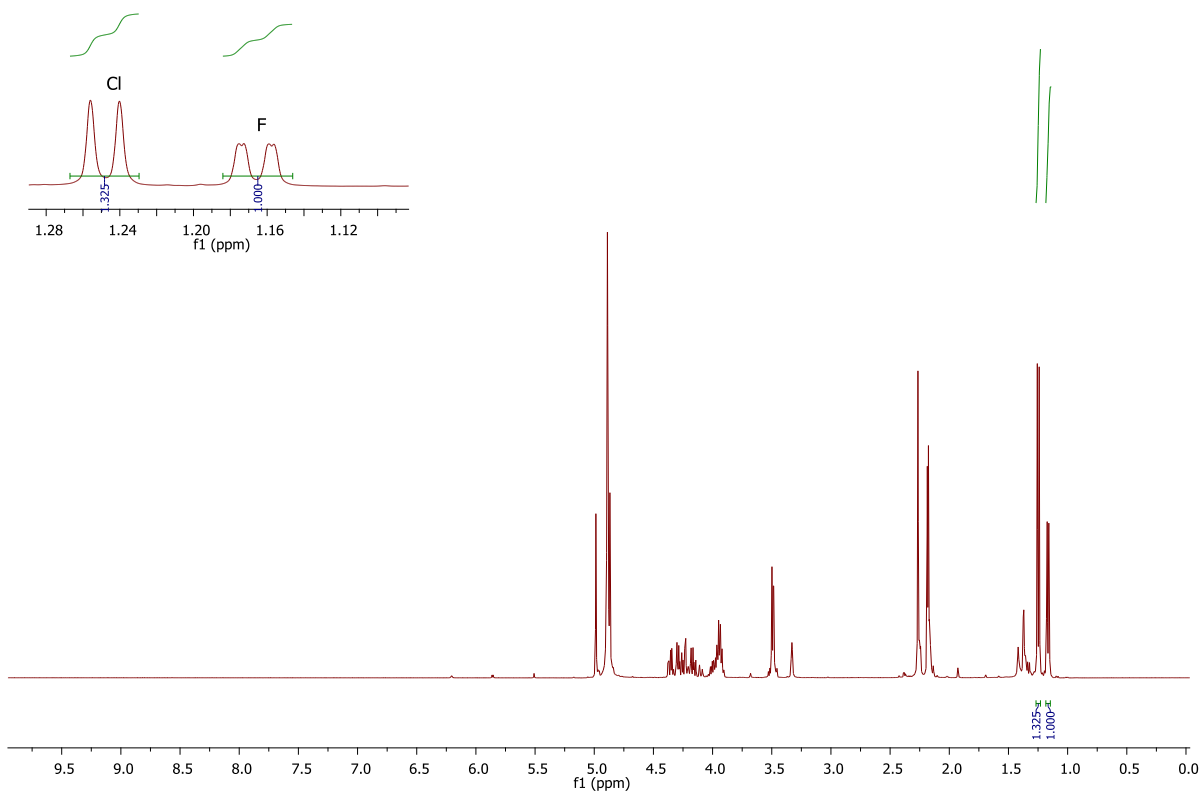

Supplement: Additional file 1 [file 1860-5397-13-284-S1.pdf]
